# Supplementary material
Source: PubMed Central journal article supplement (PMC8131238)

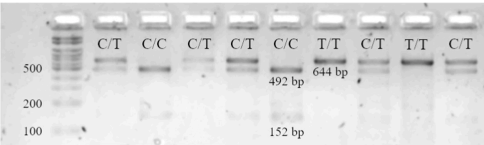

Supplement: NIHMS1691670-supplement-4.pdf [file NIHMS1691670-supplement-4.pdf]

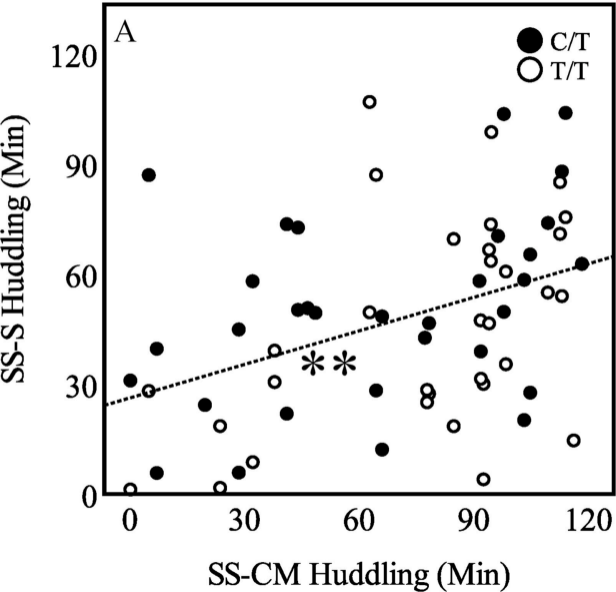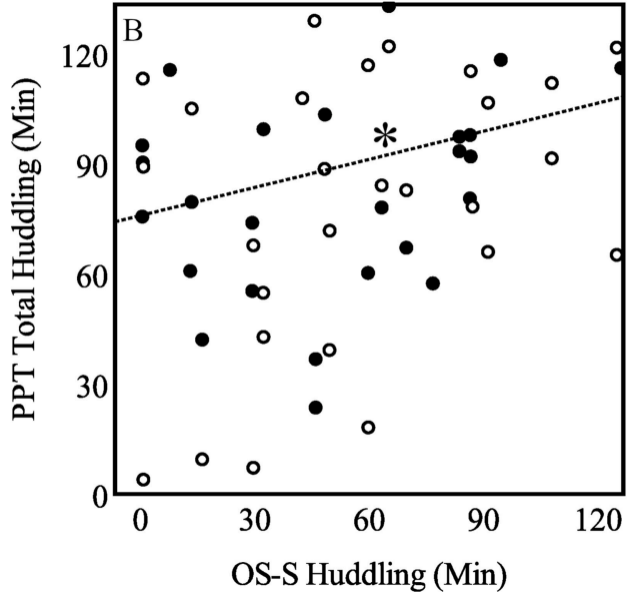

Supplement: NIHMS1691670-supplement-5.pdf [file NIHMS1691670-supplement-5.pdf]
